# Supplementary material for: Sexual Orientation Discrimination and Exclusive, Dual, and Polytobacco Use among Sexual Minority Adults in the United States
Source: MDPI journal article supplement (doi:10.3390/ijerph19106305), 2022-05-23
Supplement: s1 [file s1]

**Table S1.** Weighted Proportions of Sexual Minority Status Indicators by Sex Among the Full and Analytic Samples of Sexual Minority Adults Asked About Sexual Orientation Discrimination

|                                        | Full Sample          |                      |                      | Analytic Sample    |                    |                    |
|----------------------------------------|----------------------|----------------------|----------------------|--------------------|--------------------|--------------------|
|                                        |                      | By Sex               |                      |                    | By Sex             |                    |
|                                        | Overall              | Female               | Male                 | Overall            | Female             | Male               |
|                                        | ( <i>n</i> = 36,309) | ( <i>n</i> = 20,447) | ( <i>n</i> = 15,862) | ( <i>n</i> = 3453) | ( <i>n</i> = 2215) | ( <i>n</i> = 1238) |
| Sexual attraction, <i>n</i> (%)        |                      |                      |                      |                    |                    |                    |
| Only attracted to females              | 15054 (45.7)         | 530 (2.5)            | 14524 (92.3)         | 556 (15.9)         | 348 (15.3)         | 208 (17.0)         |
| Mostly attracted to females            | 544 (1.5)            | 115 (0.5)            | 429 (2.6)            | 531 (17.2)         | 114 (4.8)          | 417 (36.4)         |
| Equally attracted to females and males | 582 (1.4)            | 444 (2.0)            | 138 (0.7)            | 571 (15.3)         | 438 (19.1)         | 133 (9.6)          |
| Mostly attracted to males              | 1074 (2.7)           | 933 (4.4)            | 141 (0.8)            | 1040 (29.8)        | 903 (42.3)         | 137 (10.6)         |
| Only attracted to males                | 18720 (47.8)         | 18228 (89.6)         | 492 (2.8)            | 636 (18.4)         | 339 (15.3)         | 297 (23.1)         |
| Unknown                                | 335 (0.9)            | 197 (0.9)            | 138 (0.8)            | 119 (3.3)          | 73 (3.3)           | 46 (3.4)           |
| Sexual behavior, <i>n</i> (%)          |                      |                      |                      |                    |                    |                    |
| Only males                             | 18871 (48.0)         | 18353 (89.9)         | 518 (2.8)            | 1221 (35.0)        | 897 (42.2)         | 324 (24.0)         |
| Only females                           | 14710 (44.7)         | 332 (1.6)            | 14378 (91.1)         | 576 (18.1)         | 165 (6.9)          | 411 (35.3)         |
| Both males and females                 | 1455 (3.6)           | 1040 (4.6)           | 415 (2.5)            | 1424 (40.2)        | 1022 (44.6)        | 402 (33.5)         |
| Never had sex                          | 908 (2.8)            | 503 (2.8)            | 405 (2.8)            | 104 (3.1)          | 51 (2.6)           | 53 (4.0)           |
| Unknown                                | 365 (0.9)            | 219 (1.1)            | 146 (0.8)            | 128 (3.5)          | 80 (3.7)           | 48 (3.2)           |
| Sexual orientation, <i>n</i> (%)       |                      |                      |                      |                    |                    |                    |
| Heterosexual                           | 34644 (95.9)         | 19454 (95.6)         | 15190 (96.3)         | 2041 (60.8)        | 1364 (63.4)        | 677 (56.7)         |
| Lesbian or gay                         | 586 (1.5)            | 265 (1.2)            | 321 (1.8)            | 577 (16.4)         | 261 (11.3)         | 316 (24.3)         |
| Bisexual                               | 566 (1.3)            | 422 (1.8)            | 144 (0.8)            | 553 (15.0)         | 415 (17.8)         | 138 (10.7)         |
| Not sure                               | 199 (0.5)            | 130 (0.6)            | 69 (0.4)             | 189 (5.3)          | 124 (5.3)          | 65 (5.3)           |
| Unknown                                | 314 (0.8)            | 176 (0.8)            | 138 (0.8)            | 93 (2.5)           | 51 (2.2)           | 42 (2.9)           |

**Table S2.** Weighted Prevalence of Past-Year Exclusive, Dual, and Polytobacco Product Use Among Sexual Minority Adults ( $n = 3453$ )

|                                   | <i>n (%)</i> |
|-----------------------------------|--------------|
| 16-category variable              |              |
| Never/former                      | 2217 (64.8)  |
| Exclusive cigarette               | 886 (24.3)   |
| Exclusive ENDS                    | 10 (0.3)     |
| Exclusive other combustible (OC)  | 47 (1.4)     |
| Exclusive smokeless tobacco (SLT) | 22 (0.7)     |
| Dual cigarette + ENDS             | 150 (4.8)    |
| Dual cigarette + OC               | 63 (1.8)     |
| Dual cigarette + SLT              | 15 (0.5)     |
| Dual ENDS + OC                    | 3 (0.1)      |
| Dual ENDS + SLT                   | 0 (0.0)      |
| Dual OC + SLT                     | 2 (0.1)      |
| Poly cigarette + ENDS + OC        | 21 (0.5)     |
| Poly cigarette + ENDS + SLT       | 8 (0.3)      |
| Poly cigarette + OC + SLT         | 6 (0.3)      |
| Poly ENDS + OC + SLT              | 0 (0.0)      |
| Poly cigarette + ENDS + OC + SLT  | 3 (0.1)      |
| 4-category variable               |              |
| Never/former                      | 2217 (64.8)  |
| Exclusive use                     | 965 (26.7)   |
| Dual use                          | 233 (7.3)    |
| Polyuse                           | 38 (1.2)     |

ENDS: Electronic nicotine delivery systems

OC: Other combustibles (cigars or traditional pipe)

SLT: Smokeless tobacco

**Table S3.** Weighted Means of Prior-to-Past-Year Experiences of Sexual Orientation Discrimination Overall and by Past-Year Exclusive, Dual, and Polytobacco Use With Pairwise Comparisons Between Tobacco Use Groups ( $n = 3453$ )

|                                                                        | Past-Year Tobacco Product Use       |                                |                           |                         | P <sup>a</sup> | P <sup>b</sup> | P <sup>c</sup> | P <sup>d</sup> |
|------------------------------------------------------------------------|-------------------------------------|--------------------------------|---------------------------|-------------------------|----------------|----------------|----------------|----------------|
|                                                                        | Never/Former Use<br>( $n = 2,217$ ) | Exclusive Use<br>( $n = 965$ ) | Dual Use<br>( $n = 233$ ) | Polyuse<br>( $n = 38$ ) |                |                |                |                |
| Sexual orientation discrimination items,<br>mean (95% CI) <sup>e</sup> |                                     |                                |                           |                         |                |                |                |                |
| Obtaining health care or insurance                                     | 0.10 (0.08, 0.12)                   | 0.09 (0.06, 0.13)              | 0.16 (0.06, 0.26)         | 0.47 (0.06, 0.89)       | 0.09           | 0.24           | 0.07           | 0.13           |
| Receiving health care                                                  | 0.10 (0.08, 0.12)                   | 0.10 (0.07, 0.14)              | 0.13 (0.05, 0.22)         | 0.36 (-0.06, 0.78)      | 0.18           | 0.56           | 0.22           | 0.28           |
| While in public places                                                 | 0.23 (0.20, 0.27)                   | 0.27 (0.20, 0.33)              | 0.38 (0.26, 0.50)         | 0.52 (0.06, 0.97)       | <b>0.013</b>   | 0.08           | 0.26           | 0.56           |
| While in other situations                                              | 0.13 (0.10, 0.16)                   | 0.14 (0.10, 0.18)              | 0.21 (0.10, 0.32)         | 0.20 (-0.03, 0.42)      | 0.16           | 0.25           | 0.61           | 0.91           |
| Called names                                                           | 0.26 (0.22, 0.30)                   | 0.30 (0.23, 0.38)              | 0.44 (0.32, 0.55)         | 0.46 (0.13, 0.79)       | <b>0.003</b>   | 0.06           | 0.34           | 0.91           |
| Bullied, assaulted, or threatened                                      | 0.17 (0.13, 0.20)                   | 0.18 (0.12, 0.24)              | 0.30 (0.19, 0.42)         | 0.30 (0.06, 0.55)       | 0.06           | <b>0.049</b>   | 0.29           | 0.98           |
| Sexual orientation discrimination scale <sup>e</sup>                   | 0.99 (0.83, 1.14)                   | 1.09 (0.82, 1.36)              | 1.62 (1.08, 2.16)         | 2.31 (0.83, 3.78)       | <b>0.014</b>   | 0.08           | 0.09           | 0.36           |

<sup>a</sup> ANOVA test comparing means of each discrimination item across tobacco product use groups

<sup>b</sup> Pairwise t-test comparing means of each discrimination item between exclusive use and dual use

<sup>c</sup> Pairwise t-test comparing means of each discrimination item between exclusive use and polyuse

<sup>d</sup> Pairwise t-test comparing means of each discrimination item between dual use and polyuse

<sup>e</sup> Each sexual orientation discrimination item ranges from 0-4; the sexual orientation discrimination scale ranges from 0-24

Bold p-values are statistically significant ( $p < 0.05$ )

**Table S4.** Multivariable Multinomial Logistic Regression Models of Associations Between Past-Year Experiences of Sexual Orientation Discrimination and Past-30-Day Exclusive, Dual, and Polytabacco Use ( $n = 3453$ )

|                                         | Past-30-Day Tobacco Product Use <sup>a</sup> |                   |                  |                   |
|-----------------------------------------|----------------------------------------------|-------------------|------------------|-------------------|
|                                         | Exclusive Use                                |                   | Dual/Polyuse     |                   |
|                                         | AOR <sup>b</sup>                             | 95% CI            | AOR <sup>b</sup> | 95% CI            |
| Sexual orientation discrimination items |                                              |                   |                  |                   |
| Obtaining health care or insurance      | 1.05                                         | 0.82, 1.33        | 1.14             | 0.78, 1.69        |
| Receiving health care                   | 0.92                                         | 0.72, 1.18        | 1.11             | 0.75, 1.64        |
| While in public places                  | 1.13                                         | 0.98, 1.31        | 1.21             | 0.93, 1.56        |
| While in other situations               | 1.08                                         | 0.88, 1.32        | 1.28             | 0.89, 1.83        |
| Called names                            | 1.11                                         | 0.97, 1.28        | 1.31             | 1.00, 1.72        |
| Bullied, assaulted, or threatened       | <b>1.30</b>                                  | <b>1.03, 1.63</b> | <b>1.65</b>      | <b>1.18, 2.31</b> |
| Sexual orientation discrimination scale | 1.03                                         | 0.99, 1.07        | 1.07             | 1.00, 1.15        |

<sup>a</sup> The outcome referent group: never/former use

<sup>b</sup> Adjusted odds ratios (OR) and 95% confidence intervals (CI) adjusted for mean-centered age, quadratic age, sex, race/ethnicity, highest educational attainment, annual household income, urbanicity, and geographic region

Bold AORs and 95% CIs are statistically significant ( $p < 0.05$ )

**Table S5.** Two-Way Interaction Terms Between Prior-to-Past-Year Experiences of Sexual Orientation Discrimination and Sex (*n* = 3453)

| Two-Way Interaction Terms <sup>a</sup>      | P <sup>b</sup> |
|---------------------------------------------|----------------|
| Sexual orientation discrimination items     |                |
| Obtaining health care or insurance*sex      | 0.16           |
| Receiving health care*sex                   | 0.24           |
| While in public places*sex                  | 0.22           |
| While in other situations*sex               | 0.89           |
| Called names*sex                            | 0.63           |
| Bullied, assaulted, or threatened*sex       | 0.69           |
| Sexual orientation discrimination scale*sex | 0.52           |

<sup>a</sup> Each discrimination measure is continuous; the referent group for sex is male (vs. female)

<sup>b</sup> Wald test p-value for interaction

Two-way interactions were tested in adjusted associations between prior-to-past-year experiences of sexual orientation discrimination and past-year exclusive, dual, and polytobacco use

**Table S6.** Multivariable Multinomial Logistic Regression Models of Associations Between Prior-to-Past-Year Experiences of Sexual Orientation Discrimination and Past-Year Exclusive, Dual, and Polytobacco Use Stratified by Sexual Minority (SM) Status and Sex ( $n = 3106$ )

|                                                                             | Past-Year Tobacco Product Use <sup>a</sup> |            |                  |                   |
|-----------------------------------------------------------------------------|--------------------------------------------|------------|------------------|-------------------|
|                                                                             | Exclusive Use                              |            | Dual/Polyuse     |                   |
|                                                                             | AOR <sup>b</sup>                           | 95% CI     | AOR <sup>b</sup> | 95% CI            |
| Prior-to-past-year sexual orientation discrimination scale                  |                                            |            |                  |                   |
| By SM status and sex <sup>c</sup>                                           |                                            |            |                  |                   |
| Heterosexual women with same-sex attraction and/or behavior ( $n = 1,314$ ) | 0.97                                       | 0.88, 1.07 | 1.12             | 0.96, 1.32        |
| Heterosexual men with same-sex attraction and/or behavior ( $n = 662$ )     | 1.09                                       | 0.95, 1.25 | <b>1.23</b>      | <b>1.05, 1.44</b> |
| SM-identified women ( $n = 676$ )                                           | 1.01                                       | 0.94, 1.08 | 1.02             | 0.94, 1.10        |
| SM-identified men ( $n = 454$ )                                             | 0.94                                       | 0.88, 1.01 | 1.08             | 0.98, 1.19        |

<sup>a</sup> The outcome referent group: never/former use

<sup>b</sup> Adjusted odds ratios (OR) and 95% confidence intervals (CI) adjusted for mean-centered age, quadratic age, sex, race/ethnicity, highest educational attainment, annual household income, urbanicity, and geographic region

<sup>c</sup> SM-identified includes identifying as gay or bisexual for men and lesbian or bisexual for women respondents

Bold AORs and 95% CIs are statistically significant ( $p < 0.05$ )
